# Supplementary material for: Endothelial cells act as gatekeepers for LTβR-dependent thymocyte emigration
Source: PubMed Central journal article supplement (PMC6279407; doi:10.1084/jem.20181345), 2018-12-03
Supplement: JEM_20181345_sm.pdf [file JEM_20181345_sm.pdf]

Supplemental material

James et al., <https://doi.org/10.1084/jem.20181345>

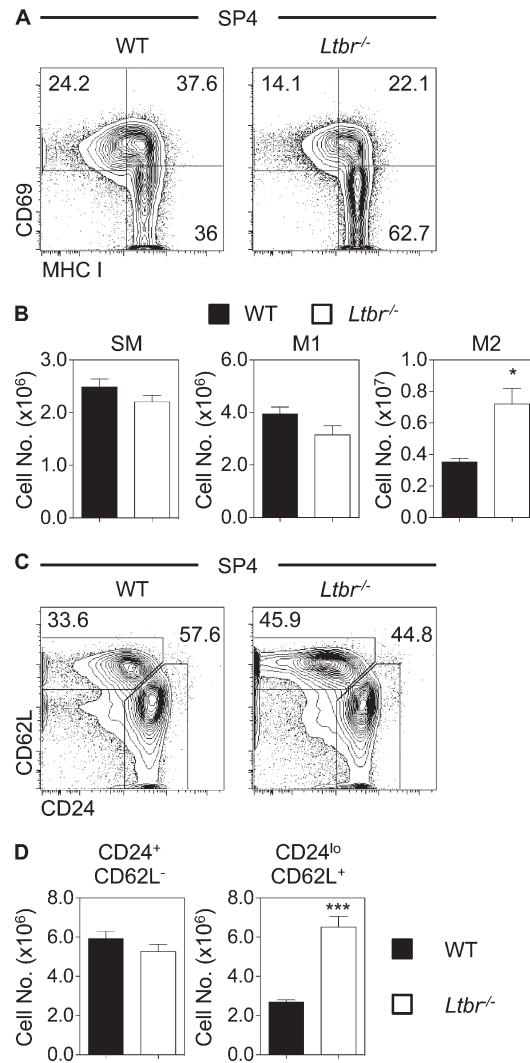

Figure S1. **Selective accumulation of mature SP4 thymocytes occurs in germline *Ltbr*<sup>-/-</sup> mice.** (A and B) Analysis of CD69 and MHC I expression on CD4<sup>+</sup>CD8<sup>-</sup>TCRβ<sup>hi</sup>CD25<sup>-</sup> SP4 thymocytes in WT (black) and *Ltbr*<sup>-/-</sup> (white) mice. (C and D) Analysis of CD24 and CD62L expression on SP4 thymocytes in WT (black) and *Ltbr*<sup>-/-</sup> (white) mice (*n* = 4 pooled from two independent experiments). An unpaired Student's *t* test was used for all statistical analysis. All bar charts and error bars represent means ± SEM. \*, *P* < 0.05; \*\*\*, *P* < 0.001.
